# Supplementary material for: Effect of isothermal holding time on hydrogen-induced structural transitions of WO3
Source: Royal Society of Chemistry journal article supplement (doi:10.1039/d1dt01259b), 2021-01-01
Supplement: d1dt01259b1.pdf [file d1dt01259b1.pdf]

## Supporting Information

### Effect of isothermal holding time on hydrogen-induced structural transitions of $\text{WO}_3$

Takeshi Matsukawa\* and Toru Ishigaki

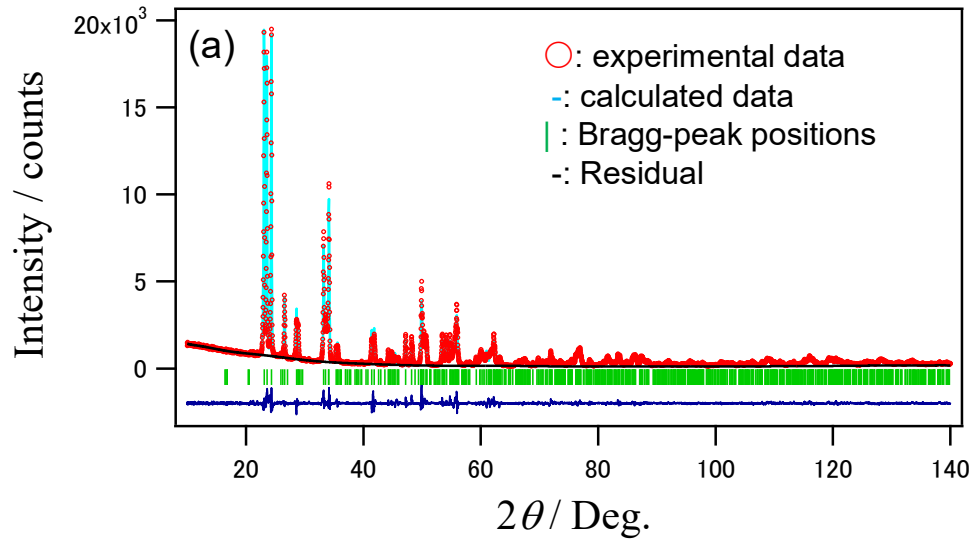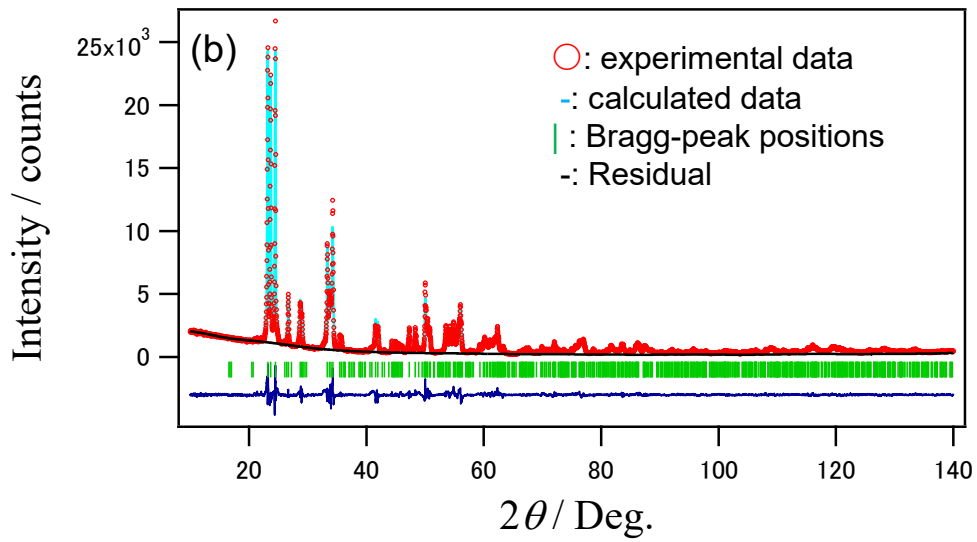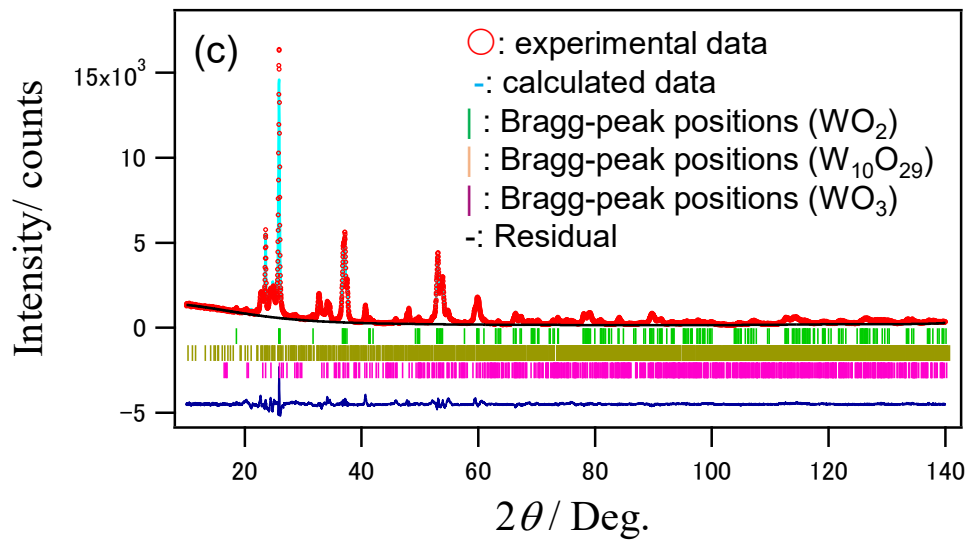

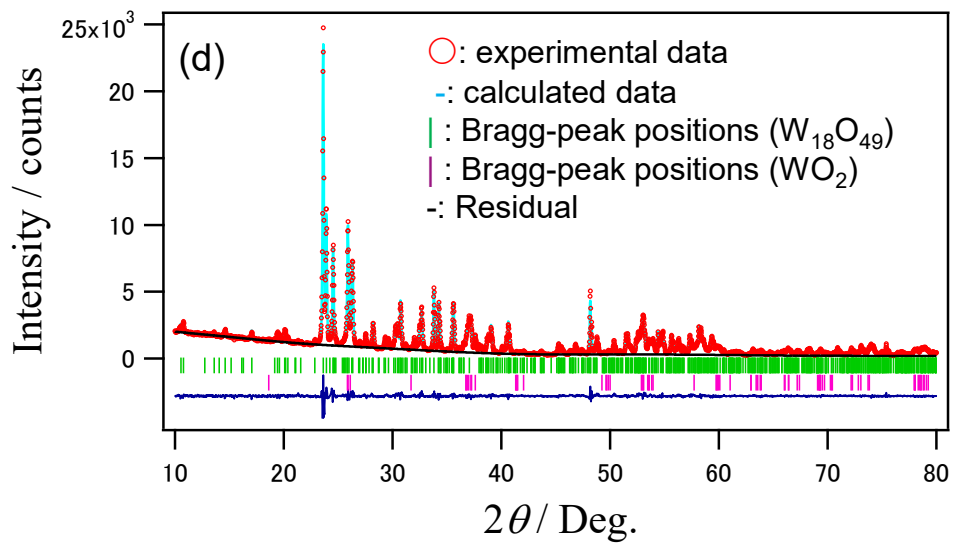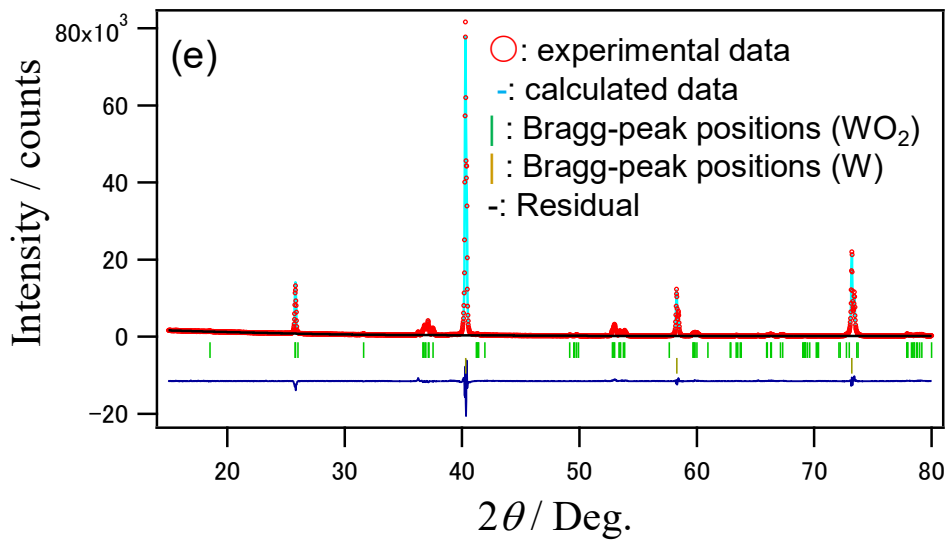

Figure S1. Rietveld refinement results of XRPD measurements of  $WO_3$  samples before and after hydrogen treatments: (a)  $WO_3$ , (b) blue  $WO_3$  (500 °C for 30 min), (c) mazarine  $WO_3$  (500 °C for 22 h), (d) mazarine  $WO_3$  (800 °C for 30 min), and (e) gray  $WO_3$  (800 °C for 22 h).

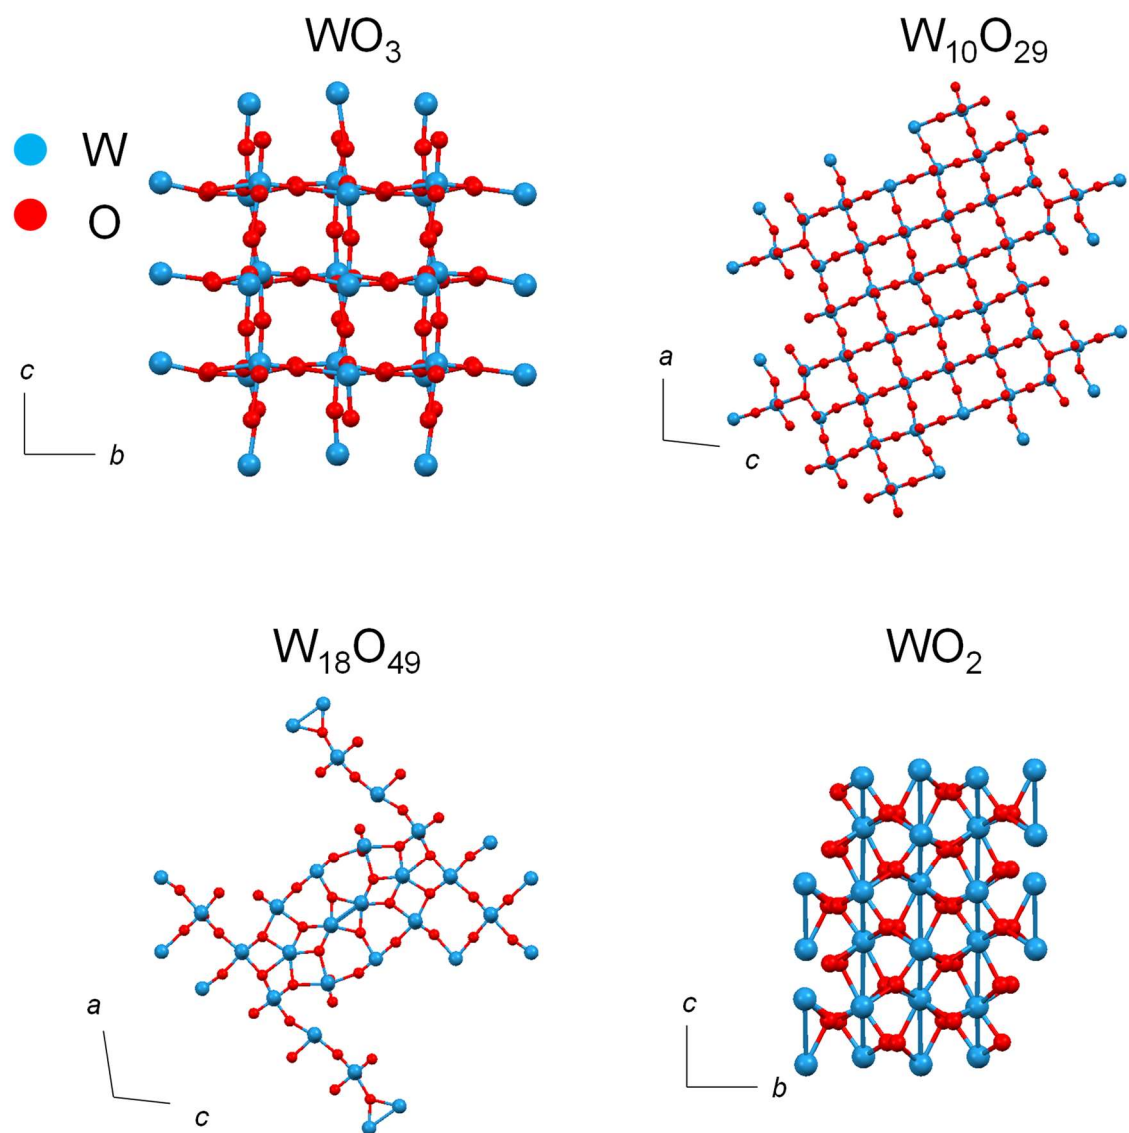

Figure S2. Crystal structures of WO<sub>3</sub>, W<sub>10</sub>O<sub>29</sub>, W<sub>18</sub>O<sub>49</sub>, and WO<sub>2</sub>.

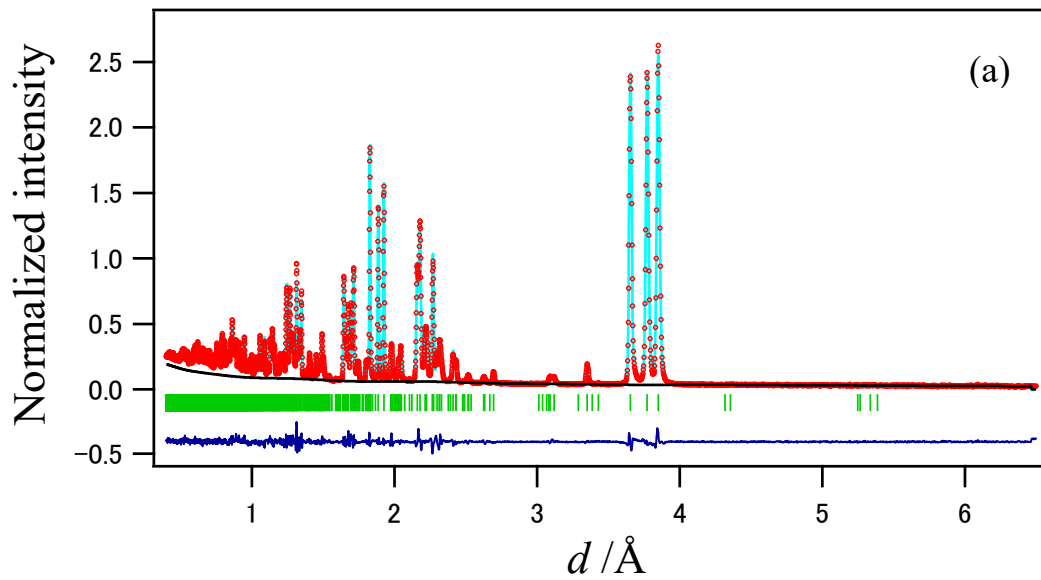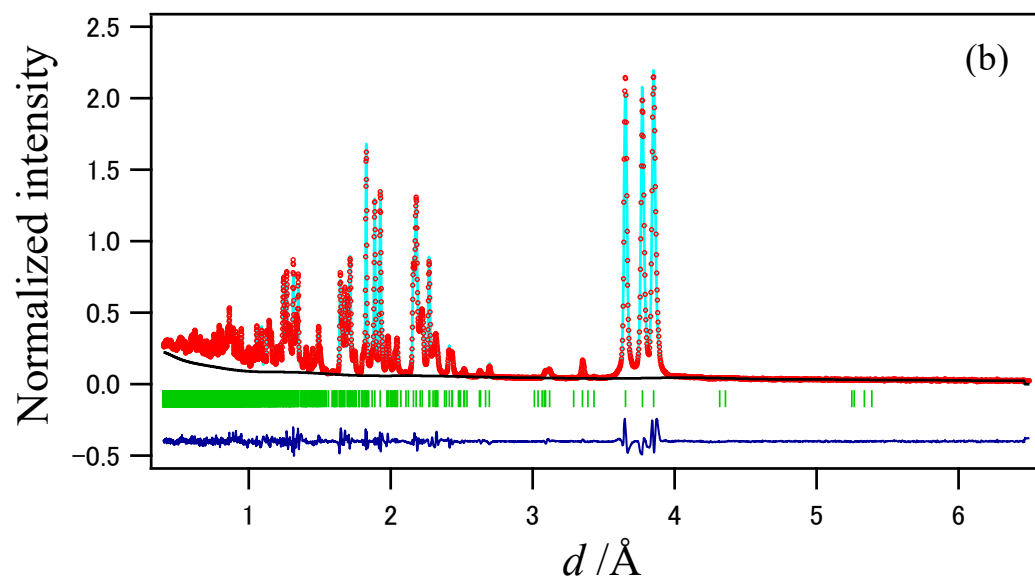

Figure S3. Rietveld refinement results of NPD measurements of  $\text{WO}_3$  and  $\text{WO}_3\text{-H}$  samples before and after hydrogen treatment: (a)  $\text{WO}_3$  and (b)  $\text{WO}_3\text{-H}$ .

Table S1. Crystallographic information (obtained by NPD) of WO<sub>3</sub> and WO<sub>3</sub>-H samples

| Temperature (°C)           | 500                                |                                    |
|----------------------------|------------------------------------|------------------------------------|
| Isothermal holding time    | 0                                  | 30 min                             |
| Chemical formula           | WO <sub>3</sub>                    | WO <sub>3</sub>                    |
| Crystal system             | Monoclinic                         | Monoclinic                         |
| Space group                | <i>P</i> 2 <sub>1</sub> / <i>n</i> | <i>P</i> 2 <sub>1</sub> / <i>n</i> |
| <i>a</i> (Å)               | 7.30959(1)                         | 7.30759(1)                         |
| <i>b</i> (Å)               | 7.54425(1)                         | 7.54425(1)                         |
| <i>c</i> (Å)               | 7.70015(1)                         | 7.70552(1)                         |
| $\beta$ (°)                | 90.7661(3)                         | 90.7661(4)                         |
| <i>V</i> (Å <sup>3</sup> ) | 424.6                              | 424.8                              |
| <i>R</i> <sub>wp</sub> (%) | 6.25                               | 7.21                               |

| Isothermal holding time at 500°C | Element    | site       | <i>g</i>   | <i>x</i>    | <i>y</i>   | <i>z</i>   | <i>B</i> <sub>iso</sub> (Å <sup>2</sup> ) |
|----------------------------------|------------|------------|------------|-------------|------------|------------|-------------------------------------------|
| WO <sub>3</sub> (0 min)          | W (1)      | 4 <i>e</i> | 1          | 0.2516(1)   | 0.0248(1)  | 0.28381(7) | 0.5                                       |
|                                  | W (2)      | 4 <i>e</i> | 1          | 0.2473(1)   | 0.0297(1)  | 0.78055(7) | 0.5                                       |
|                                  | O (1)      | 4 <i>e</i> | 1          | 0.00068(9)  | 0.4660(1)  | 0.21425(8) | 0.355(3)                                  |
|                                  | O (2)      | 4 <i>e</i> | 1          | 1.0010(1)   | 0.4660(1)  | 0.21780(8) | 0.355(3)                                  |
|                                  | O (3)      | 4 <i>e</i> | 1          | 0.28473(8)  | 0.26144(8) | 0.28197(8) | 0.355(3)                                  |
|                                  | O (4)      | 4 <i>e</i> | 1          | 0.21082(8)  | 0.2582(1)  | 0.73406(8) | 0.355(3)                                  |
|                                  | O (5)      | 4 <i>e</i> | 1          | 0.28510(8)  | 0.03963(8) | 0.00664(8) | 0.355(3)                                  |
| WO <sub>3</sub> (30 min)         | O (6)      | 4 <i>e</i> | 1          | 0.28521(7)  | 0.48837(7) | 0.99337(4) | 0.355(3)                                  |
|                                  | W (1)      | 4 <i>e</i> | 1          | 0.2540(1)   | 0.0245(1)  | 0.28182(8) | 0.5                                       |
|                                  | W (2)      | 4 <i>e</i> | 1          | 0.2475(1)   | 0.0271(1)  | 0.77918(8) | 0.5                                       |
|                                  | O (1)      | 4 <i>e</i> | 1          | -0.00014(1) | 0.0406(1)  | 0.21588(8) | 0.406(3)                                  |
|                                  | O (2)      | 4 <i>e</i> | 1          | 0.9986(1)   | 0.4692(1)  | 0.22012(7) | 0.406(3)                                  |
|                                  | O (3)      | 4 <i>e</i> | 1          | 0.28457(7)  | 0.2624(1)  | 0.27901(8) | 0.406(3)                                  |
|                                  | O (4)      | 4 <i>e</i> | 1          | 0.21080(7)  | 0.2582(1)  | 0.73584(8) | 0.406(3)                                  |
| O (5)                            | 4 <i>e</i> | 1          | 0.28572(9) | 0.03502(7)  | 0.00499(8) | 0.406(3)   |                                           |
|                                  | O (6)      | 4 <i>e</i> | 1          | 0.28253(8)  | 0.49050(7) | 0.99405(8) | 0.406(3)                                  |
